# Supplementary material
Source: publisher figshare collection journal article supplement (https://frontiersin.figshare.com/ndownloader/files/17483384)

## Supplementary Material

### $\alpha$ -hispanolol induces apoptosis and suppresses migration and invasion of glioblastoma cells likely via downregulation of MMP-2/9 expression and p38MAPK attenuation

Vanesa Sánchez-Martín<sup>1,2</sup>, Lidia Jiménez-García<sup>1,3</sup>, Sandra Herranz<sup>1</sup>, Alfonso Luque<sup>1</sup>, Paloma Acebo<sup>1</sup>, Ángel Amesty<sup>4</sup>, Ana Estévez-Braun<sup>4</sup>, Beatriz de las Heras<sup>2,\*</sup> and Sonsoles Hortelano<sup>1,\*</sup>

\* Correspondence: [shortelano@isciii.es](mailto:shortelano@isciii.es); [lasheras@ucm.es](mailto:lasheras@ucm.es)

#### Supplementary Data 1: Procedure for $\alpha$ -hispanolol ( $\alpha$ -H) preparation

$\alpha$ -hispanolol ( $\alpha$ -H) was obtained from the natural diterpene hispanolone as previously reported (Giron et al., 2008) following the procedure described by Rodríguez-Hahn *et al.* (Rodríguez-Hahn et al., 1995).

Thus 40 mg of hispanolone in 5 mL of EtOH:Dioxane (3:2) were treated with 4 equiv of NaBH<sub>4</sub> (19.0 mg) and the reaction mixture was stirred for 4 h, until disappearance of the starting material. Then the reaction mixture was treated with 5 mL of 5% NaOH, and extracted with CH<sub>2</sub>Cl<sub>2</sub> (3 x 5 mL). The combined organic layers were washed with brine, dried over MgSO<sub>4</sub> and filtered. The solvent was removed under reduced pressure and the crude was purified by preparative-TLC using Hexanes: EtOAc (7:3) to yield 11.4 mg (28%) of  $\alpha$ -hispanolol and 2.5 mg (6%) of its epimer  $\beta$ -hispanolol.

$\alpha$ -hispanolol is stable in DMSO since <sup>1</sup>HNMR of  $\alpha$ -hispanolol in DMSO-d<sub>6</sub> run after 24 h and 48 h did not show decomposition.

#### Supplementary Figure 1: Chemical structure of $\alpha$ -hispanolol ( $\alpha$ -H)

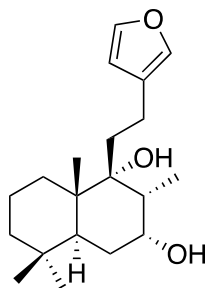

Supplementary Figure 2:  $^1\text{H}$  NMR ( $\text{CDCl}_3$ , 500 MHz) of  $\alpha$ -hispanolol ( $\alpha$ -H)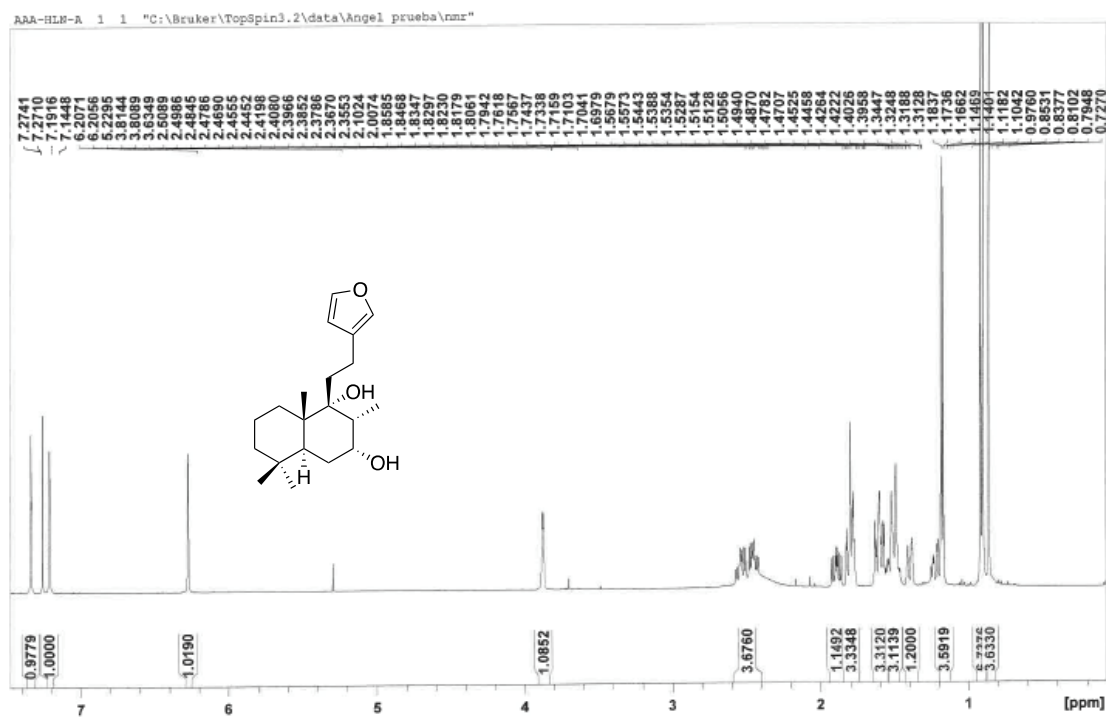Supplementary Figure 3:  $^{13}\text{C}$  NMR ( $\text{CDCl}_3$ , 125 MHz) of  $\alpha$ -hispanolol ( $\alpha$ -H)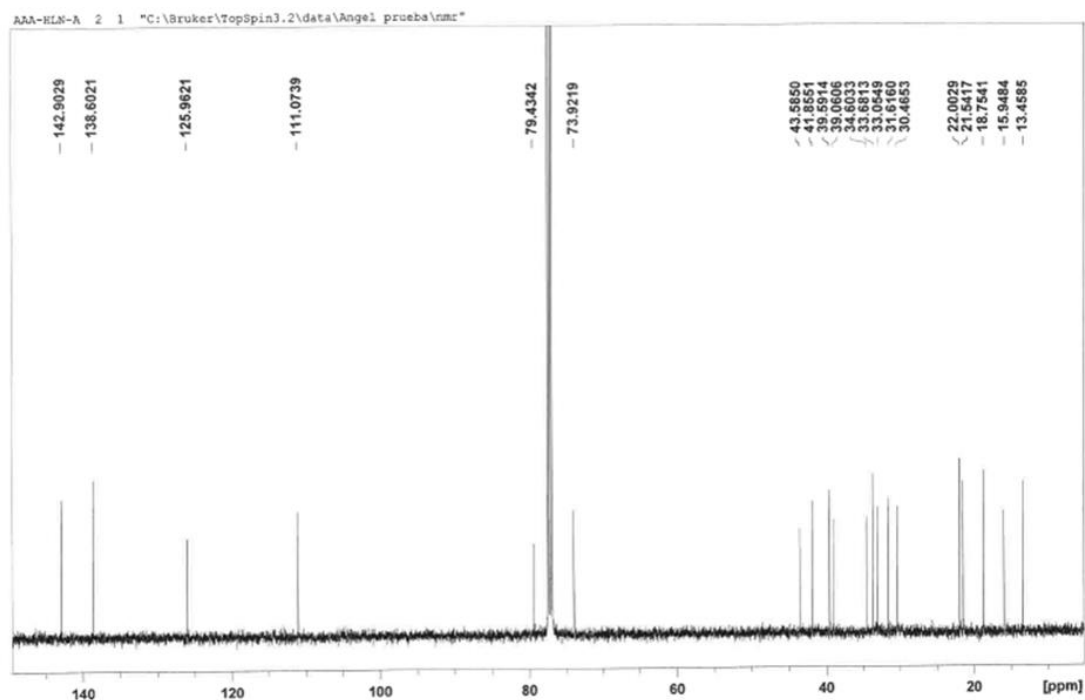

**Supplementary Figure 4: Effects of  $\alpha$ -hispanolol ( $\alpha$ -H) on morphology and apoptosis in U373 cells.** (A) Microphotographs were taken after 24 h of incubation with 25  $\mu$ M  $\alpha$ -H or vehicle as control. No signs of characteristics of apoptosis are observed. (Scale bars = 40  $\mu$ m). Data presented are from one representative experiment out of three. (B) U373 cells were treated with different concentrations of  $\alpha$ -H (1-100  $\mu$ M) or vehicle as control for 24 h. Collected cells were stained with annexin V-FITC and propidium iodide, and then analyzed by flow cytometry. Graph show percentage of apoptotic cells  $\pm$  S.D. from three independent experiments.

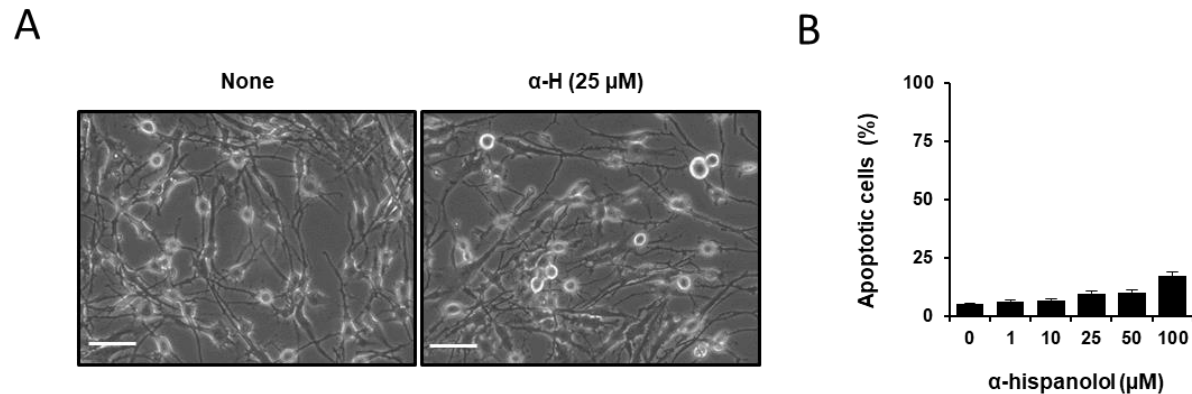

**Supplementary Figure 5.  $\alpha$ -H did not exhibit significant toxicity in non tumoral microglia cells.** BV2 cells were treated with different concentrations of  $\alpha$ -H (1-100  $\mu$ M) for 24h. (A) Cell viability was determined by MTT assay and reported as mean of the cell viability percentage  $\pm$  S.D. from three independent experiments. (B) Apoptosis was analysed by flow cytometry after stained with annexin V-FITC and propidium iodide. Graph bars show percentage of apoptotic cells  $\pm$  S.D. from three independent experiments.

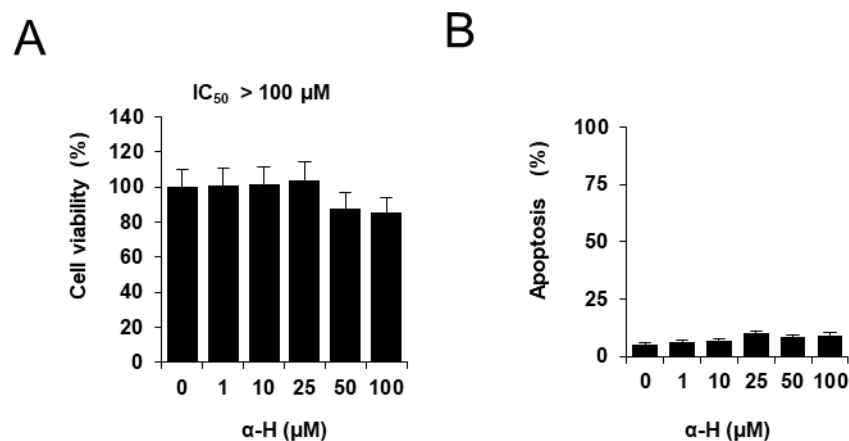

Supplement: Supplementary file [file 17483384]
